# Supplementary material for: Metal–organic framework derived yolk–shell NiS2/carbon spheres for lithium–sulfur batteries with enhanced polysulfide redox kinetics
Source: Royal Society of Chemistry journal article supplement (doi:10.1039/c9cc00486f), 2019-01-01
Supplement: c9cc00486f1.pdf [file c9cc00486f1.pdf]

## Electronic Supplementary Information

---

### **Metal-organic frameworks derived yolk-shell NiS<sub>2</sub>/carbon spheres for lithium-sulfur batteries with enhanced polysulfide redox kinetics**

Yaxi Tian, Huawen Huang, Guoxue Liu, Ran Bi, and Lei Zhang\*

School of Chemistry & Chemical Engineering, South China University of Technology,  
Guangzhou 510640, P. R. China

E-mail:

[celeizhang@scut.edu.cn](mailto:celeizhang@scut.edu.cn)

## Experimental Section

### *Materials Synthesis*

#### *Synthesis of yolk-shell Ni-MOFs.*

Yolk-shell Ni-MOFs was synthesized *via* a solvothermal method.<sup>S1</sup> Typically, 0.15 g of trimesic acid, 1.5 g of polyvinylpyrrolidone (Sigma-Aldrich, Mw = 40,000), and 0.432 g of Ni(NO<sub>3</sub>)<sub>2</sub>·6H<sub>2</sub>O were added to a mixture of 10 mL of H<sub>2</sub>O, 10 mL of DMF, and 10 mL of ethanol to obtain a light green solution. After stirring for 40 min, the solution was then transferred to 50 mL of Teflon-line sealed autoclave and kept at 150 °C for 10 h. After cooling down to room temperature, the obtained light green product was collected by centrifugation and washed with ethanol for three times. For the synthesis of hollow Ni-MOFs, the hydrothermal time was prolonged to 15 h while the other condition is the same.

#### *Synthesis of yolk-shell NiS<sub>2</sub>/C.*

0.1 g of yolk-shell Ni-MOFs and 0.08 g of sulfur powder were placed into a porcelain boat, where sulfur powder was placed at the upstream side of tube furnace. Then, the tube furnace was heated to 450 °C for 2 h with a ramp rate of 1 °C min<sup>-1</sup> in N<sub>2</sub> (60 mL min<sup>-1</sup>). After cooling down to room temperature, the dark product was named as yolk-shell NiS<sub>2</sub>/C. The hollow NiS<sub>2</sub>/C spheres were formed by replacing yolk-shell Ni-MOFs spheres with hollow Ni-MOFs.

#### *Synthesis of yolk-shell C.*

0.1 g of yolk-shell Ni-MOFs was heated at 450 °C for 2 h with a ramp rate of 1 °C

min<sup>-1</sup> in N<sub>2</sub> (60 mL min<sup>-1</sup>). After cooling down to room temperature, the dark product was added into 30 mL 2 M HCl, and heated at 150 °C for 24 h. The obtained product was washed with deionized water and ethanol for several times and dried at 60 °C.

#### *Synthesis of yolk-shell NiS<sub>2</sub>/C-S.*

A mixture of yolk-shell NiS<sub>2</sub>/C and sulfur powder with a mass ration of 3:7 was grinded for 30 min. Then, the mixture was transferred to 50 mL of Teflon-line sealed autoclave and heated at 155 °C for 24 h. After cooling down to temperature, yolk-shell NiS<sub>2</sub>/C-S was obtained. For comparison, hollow NiS<sub>2</sub>/C-S and yolk-shell C-S were prepared under the same condition.

#### *Adsorption Experiments*

Li<sub>2</sub>S<sub>6</sub> solution was prepared by mixing Li<sub>2</sub>S and sulfur with a molar ration of 1:5 in 1, 2-dimethoxyethane (DME), and stirred for 20 h at room temperature in an argon-filled glove box. 15 mg of yolk-shell C, hollow NiS<sub>2</sub>/C and yolk-shell NiS<sub>2</sub>/C were dispersed into 2.0 mL of Li<sub>2</sub>S<sub>6</sub> solution and vigorously stirred to evaluate the adsorption capacity for Li<sub>2</sub>S<sub>6</sub>, respectively. The suspensions were centrifuged before photographs were taken.

#### *Materials Characterizations*

All the samples were characterized by field-emission scanning electron microscopy (FESEM; Hitachi SU8220), transmission electron microscopy (TEM; JEOL JEM-2100F), and X-ray diffraction (XRD; Bruker D8 Advance). Thermogravimetric analysis (TGA) was measured on the STA449 instrument with a ramp rate of 10 °C

min<sup>-1</sup> under a nitrogen atmosphere. The nitrogen sorption isotherms were measured on a Micromeritics 3 Flex system at liquid-nitrogen temperature.

### ***Electrochemical Measurement***

The working electrode was prepared by mixing active materials, conductive carbon, and poly(vinylidene fluoride) (PVDF) with a mass ration of 7:2:1 in N-methyl-2-pyrrolidinone (NMP) to make a homogenous slurry. The slurry was coated on the surface of carbon coated aluminum foil with the sulfur loading mass about 1.0 mg cm<sup>-2</sup>. The electrolyte was 1.0 M Lithium bis(trifluoromethanesulfonyl)imide (LiTFSI) dissolved in dimethoxymethane/ 1,3-dioxolane (DME/DOL, 1:1, v/v) with 2.0 wt% LiNO<sub>3</sub>. The amount of electrolyte is 20 μL mg<sup>-1</sup>. Lithium metal foil and Celgard 2400 were used as the anode and separator, respectively. Galvanostatic charge/discharge tests were carried out using Neware Battery Testing System between 1.7 and 2.8 V. Cyclic voltammetry measurements were performed at a scan rate of 0.1 mV s<sup>-1</sup>.

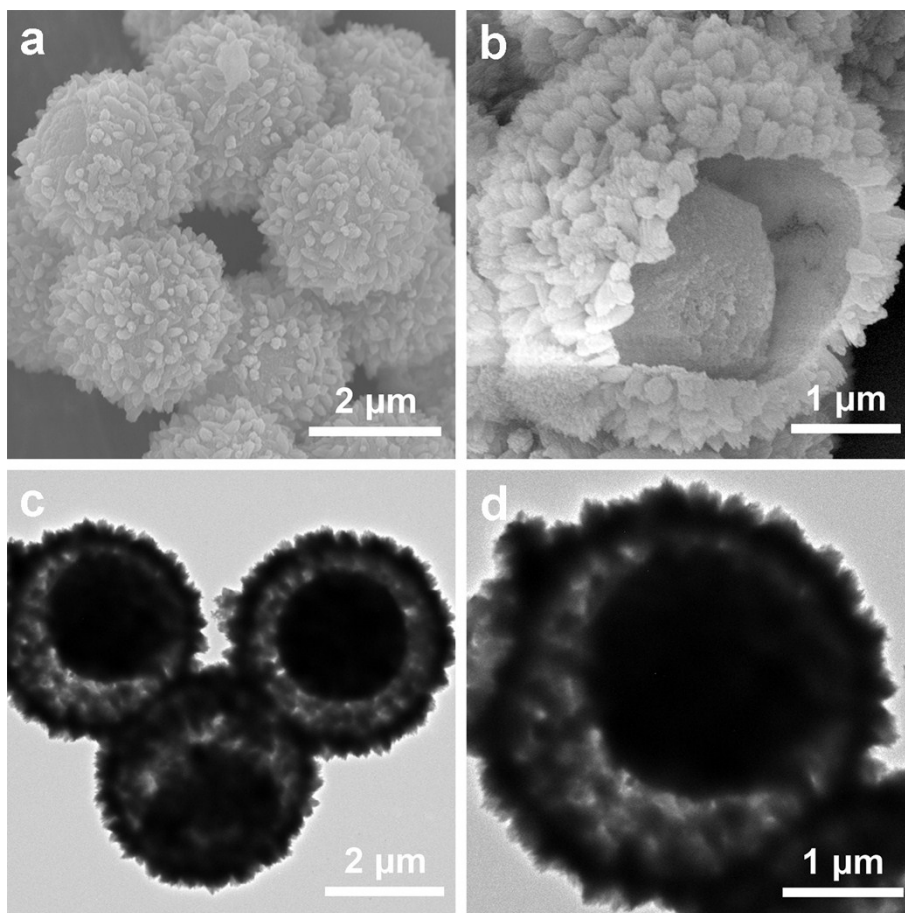

**Fig. S1** (a, b) SEM and (c, d) TEM images of yolk-shell Ni-MOFs.

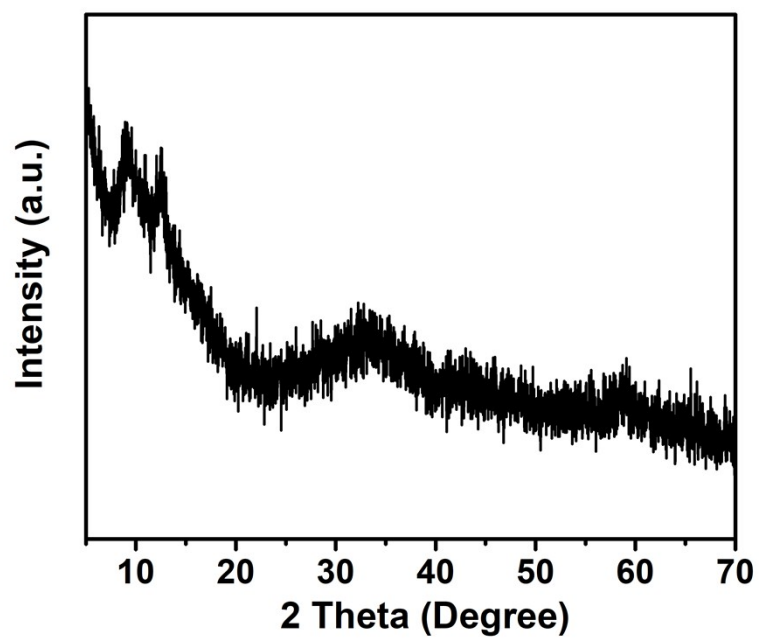

Fig. S2 XRD pattern of yolk-shell Ni-MOFs.

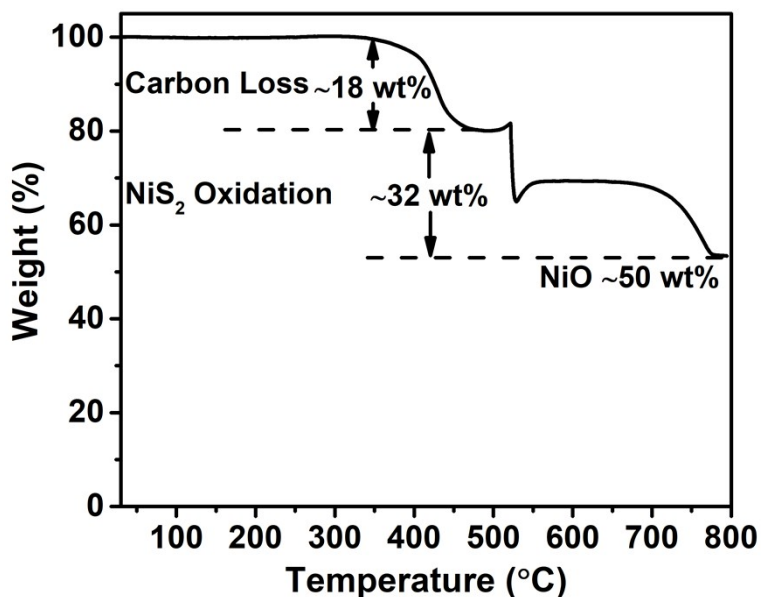

**Fig. S3** Thermogravimetric analysis (TGA) curve of yolk-shell NiS<sub>2</sub>/C in air with a heating rate of 10 °C min<sup>-1</sup>.

The weight loss of 18 wt% between 300 and 450 °C is ascribed to the carbon loss. With the increasing temperature, NiS<sub>2</sub> is oxidized to NiS, NiO, and NiSO<sub>4</sub>. The weight increase appearing 520 – 600 °C is observed owing to the formation of NiSO<sub>4</sub>. The final residue is 50 wt% NiO. Based on the following chemical reaction:

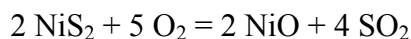

the weight content of NiS<sub>2</sub> is calculated as follow:

$$\text{NiS}_2 \text{ wt\%} = 50 \text{ wt\%} \times \text{Mw}(\text{NiS}_2) \div \text{Mw}(\text{NiO}) = 50 \text{ wt\%} \times 123 \div 75 = 82 \text{ wt\%}.$$

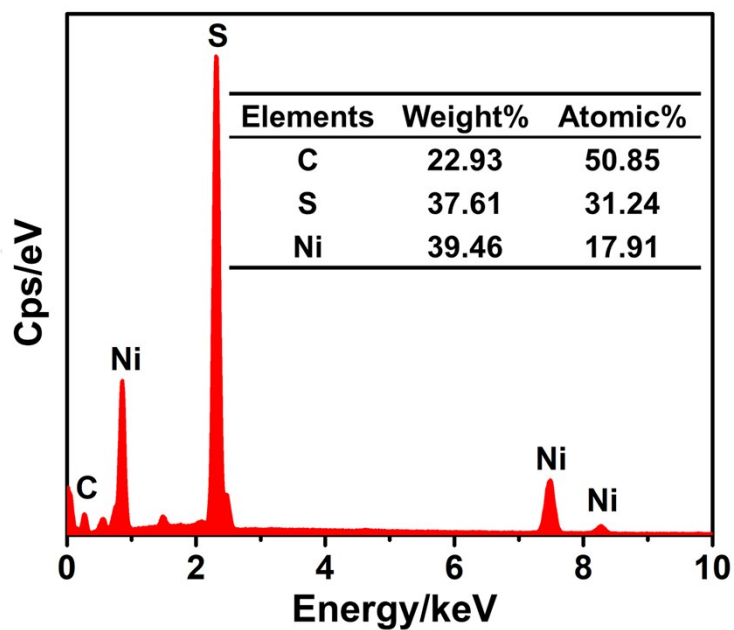

**Fig. S4** Energy dispersive spectrometer in scanning electron microscopy (SEM-EDS) spectrum of yolk-shell NiS<sub>2</sub>/C.

SEM-EDS spectrum result of yolk-shell NiS<sub>2</sub>/C reveals that the atomic ratio of Ni and S is about 1:2. Based on the weight of Ni (39.46 wt%) and S (37.61 wt%) elements, the content of NiS<sub>2</sub> in the yolk-shell NiS<sub>2</sub>/C is calculated as about 77 wt% (39.46 wt% + 37.61 wt%), which is very close to the result of TGA (**Fig. S3**).



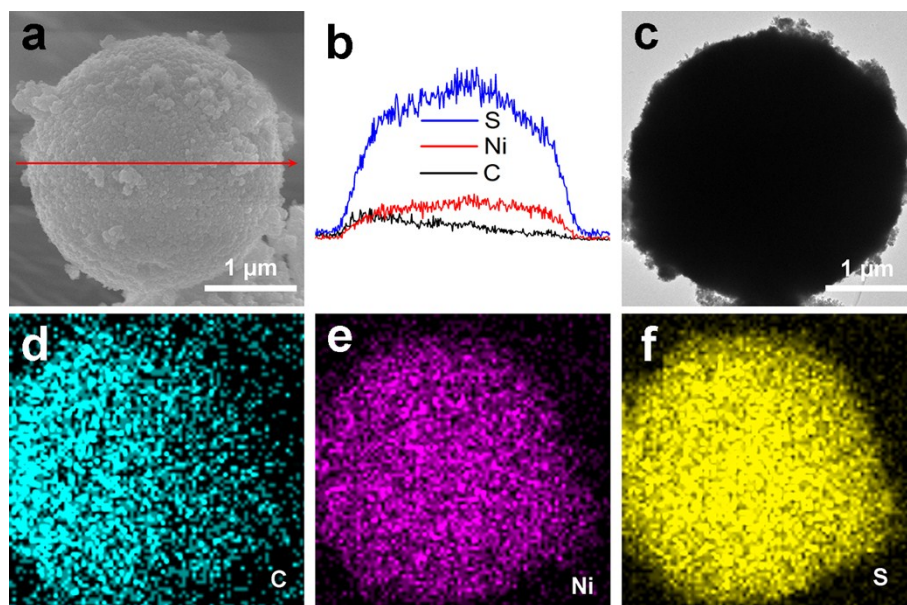

**Fig. S5** (a) SEM image of yolk-shell  $\text{NiS}_2/\text{C-S}$ . (b) The line-scanning curves of C, Ni and S, corresponding to the red arrow in (a). (c) TEM image of yolk-shell  $\text{NiS}_2/\text{C-S}$ . (d–f) Element mapping of yolk-shell  $\text{NiS}_2/\text{C-S}$ .

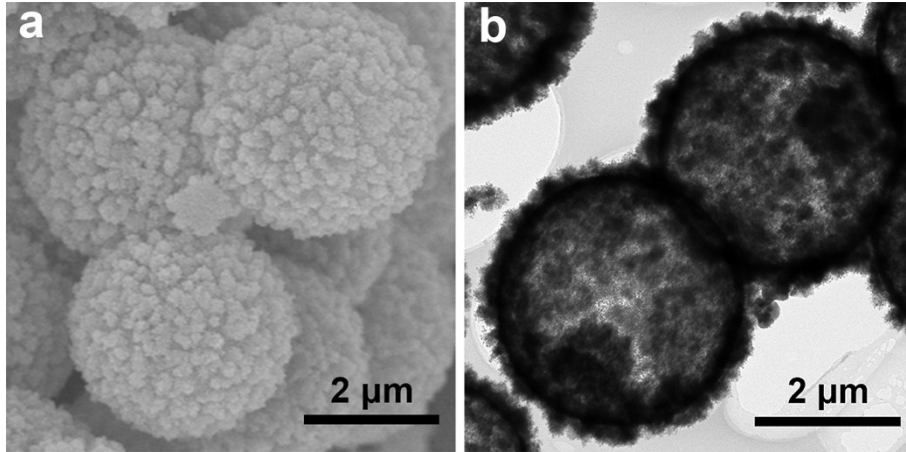

**Fig. S6** (a) SEM and (b) TEM images of hollow  $\text{NiS}_2/\text{C}$ .

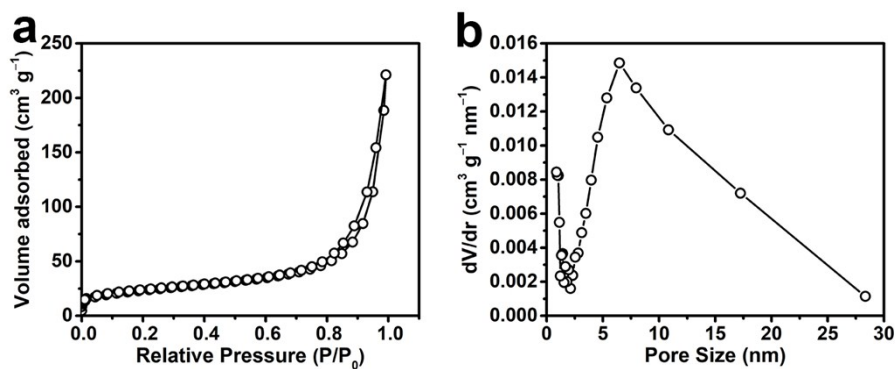

**Fig. S7** (a) N<sub>2</sub> adsorption-desorption isotherm and (b) pore size distribution plot of hollow NiS<sub>2</sub>/C.

The Brunauer-Emmett-Teller (BET) specific surface area of hollow NiS<sub>2</sub>/C is investigated by the N<sub>2</sub> adsorption-desorption measurements. N<sub>2</sub> adsorption-desorption isotherm is IV type and pore size distribution is centred at 5–12 nm. The BET specific surface area of hollow NiS<sub>2</sub>/C is 80.8 m<sup>2</sup> g<sup>-1</sup> (**Fig. S7**), which is very close to that of yolk-shell NiS<sub>2</sub>/C (78.9 m<sup>2</sup> g<sup>-1</sup>, **Fig. 3b**).

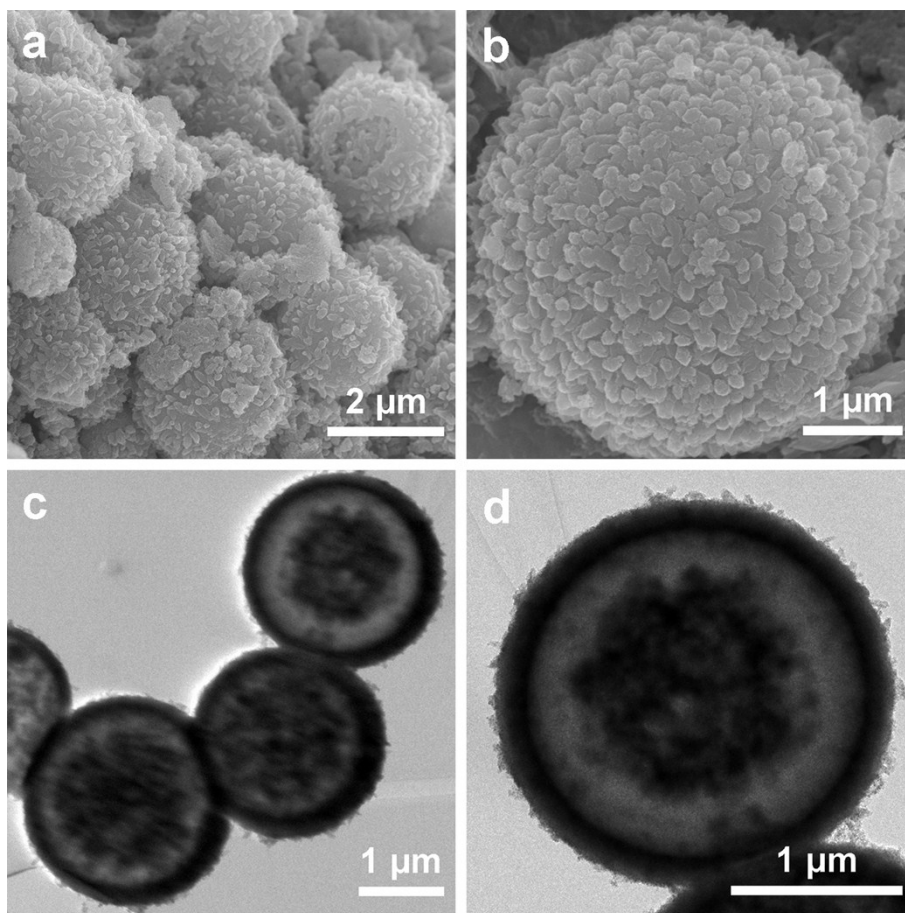

**Fig. S8** (a, b) SEM and (c, d) TEM images of yolk-shell C.

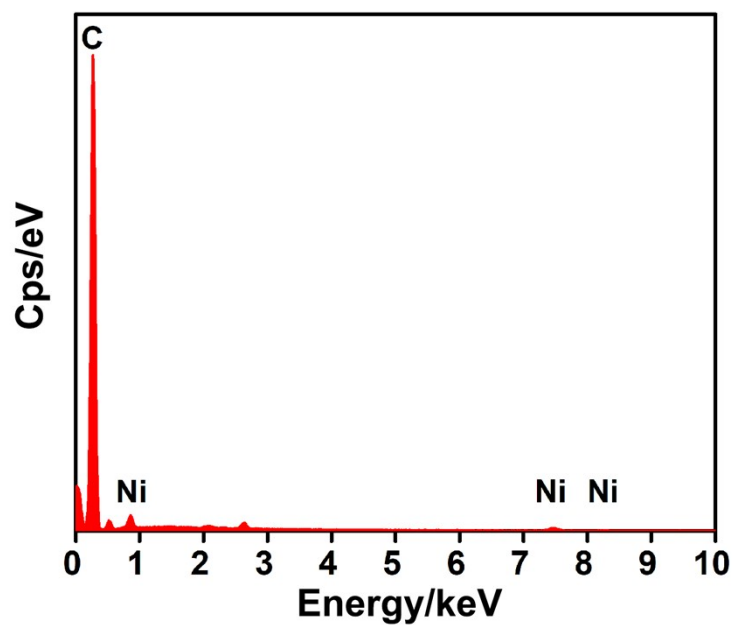

**Fig. S9** Energy dispersive spectrometer in scanning electron microscopy (SEM-EDS) spectrum of yolk-shell C. The SEM-EDS spectrum result of yolk-shell C reveals that the Ni in the yolk-shell C has been removed.

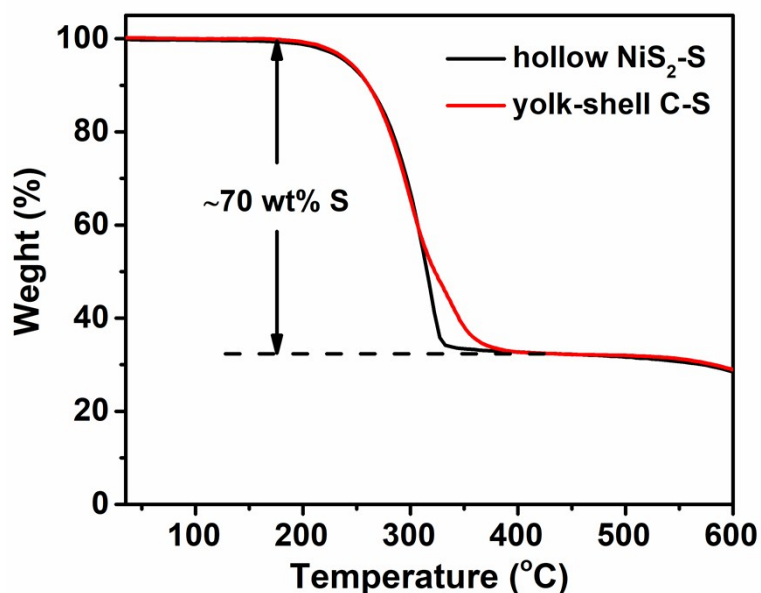

**Fig. S10** TGA curves of hollow NiS<sub>2</sub>/C-S and yolk-shell C-S in nitrogen with a heating rate of 10 °C min<sup>-1</sup>.

TGA results reveal that the loading amount of sulfur in the hollow NiS<sub>2</sub>/C-S and yolk-shell C-S both are about 70 wt% (**Fig. S10**), which are the same as that of yolk-shell NiS<sub>2</sub>/C-S (**Fig. 3d**). Yolk-shell NiS<sub>2</sub>/C-S, hollow NiS<sub>2</sub>/C-S, and yolk-shell C-S cathodes has the similar loading amount of sulfur. When tested as sulfur cathodes, the different electrochemical performance of is yolk-shell NiS<sub>2</sub>/C-S, hollow NiS<sub>2</sub>/C-S, and yolk-shell C-S cathodes is mainly attributed to their different structure.

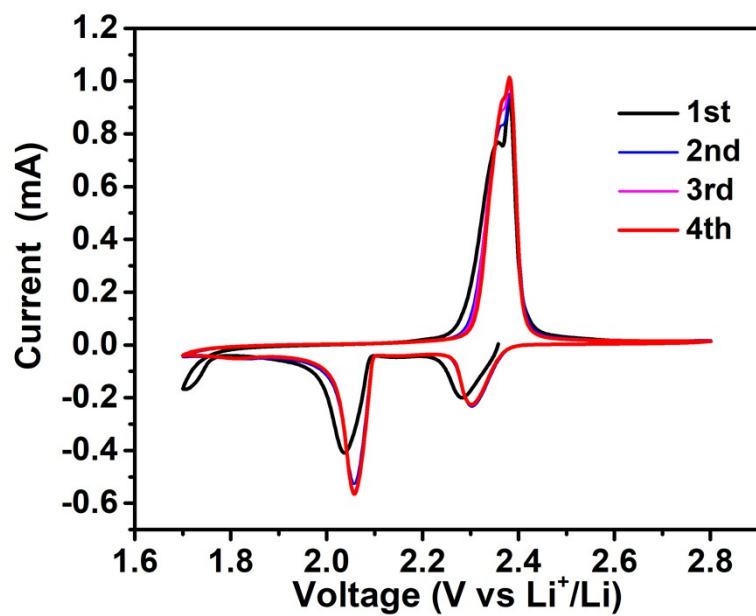

**Fig. S11** Cyclic voltammograms curves of yolk-shell NiS<sub>2</sub>/C-S cathode at a scan rate of 0.1 mV s<sup>-1</sup>.

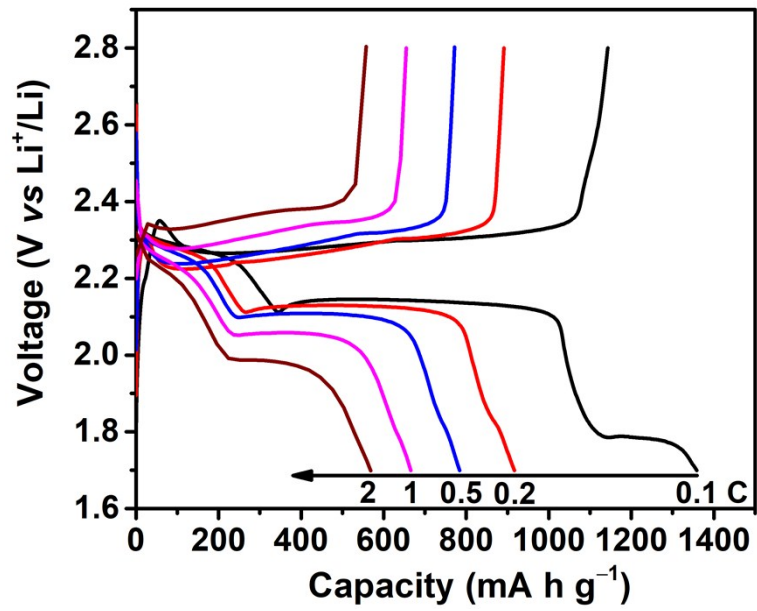

**Fig. S12** Discharge/charge profiles of yolk-shell NiS<sub>2</sub>/C-S cathode tested at various current densities.



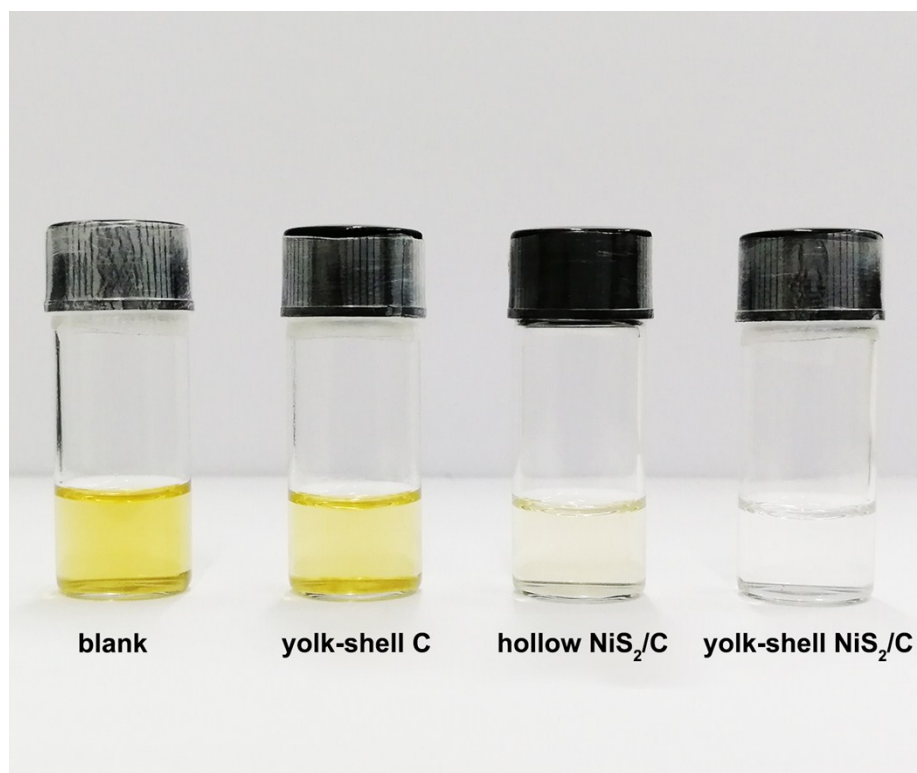

**Fig. S13** Visualized adsorption of  $\text{Li}_2\text{S}_6$  with yolk-shell C, hollow  $\text{NiS}_2/\text{C}$ , and yolk-shell  $\text{NiS}_2/\text{C}$ .

**Table S1.** Electrochemical performance comparison of yolk-shell NiS<sub>2</sub>/C-S cathode with reported sulfur cathodes for Li-S batteries.

| Sample                                   | Sulfur content (wt%) | Rate performance                    |                                  | Cycling performance                                    | Ref.             |
|------------------------------------------|----------------------|-------------------------------------|----------------------------------|--------------------------------------------------------|------------------|
|                                          |                      | Capacity (mA h g <sup>-1</sup> )    | Current density                  |                                                        |                  |
| <b>Yolk-shell NiS<sub>2</sub>/C-S</b>    | <b>70</b>            | <b>1358, 917, 784, 666, and 569</b> | <b>0.1, 0.2, 0.5, 1, and 2 C</b> | <b>394 mA h g<sup>-1</sup> after 200 cycles at 1 C</b> | <b>This work</b> |
| TiN-S                                    | 59                   | 1121, 899, 776                      | 0.1, 0.5, and 1 C                | 644 mA h g <sup>-1</sup> after 500 cycles at 0.5 C     | S2               |
| NiS <sub>2</sub> /C-S                    | 56                   | 1203, 941, 788, 702, and 574        | 0.1, 0.2, 0.5, 1, and 2 C        | 730 mA h g <sup>-1</sup> after 200 cycles at 0.5 C     | S3               |
| Co-N-doped C-S                           | 64                   | 1303, 1147, 994, and 694            | 0.1, 0.2, 0.5, and 1 C           | 669 mA h g <sup>-1</sup> after 600 cycles at 1 C       | S4               |
| CeO <sub>2</sub> @CNT-S                  | 60                   | 1359, 1033, 868, and 715            | 0.1, 0.2, 0.5, and 1 C           | 173 mA h g <sup>-1</sup> after 600 cycles at 0.5 C     | S5               |
| TiO <sub>2</sub> /rGO-S                  | 60                   | 1285, 984, 898, and 803             | 0.1, 0.2, 0.5, and 1 C           | 631 mA h g <sup>-1</sup> after 200 cycles at 0.5 C     | S6               |
| Co <sub>3</sub> S <sub>4</sub> /CNT-S    | 70                   | 1330, 1165, 988, 859, and 702       | 0.2, 0.5, 1, 2, and 5 C          | 752 mA h g <sup>-1</sup> after 500 cycles at 1C        | S7               |
| MnO <sub>2</sub> @Hollow carbon fibers-S | 71                   | 1161, 1090, 1010, 890, and 690      | 0.05, 0.1, 0.2, 0.5, and 1 C     | 662 mA h g <sup>-1</sup> after 300 cycles at 1C        | S8               |
| TiO@C-S                                  | 70                   | 1146, 1029, 910, 800, and 655       | 0.1, 0.2, 0.5, 1, and 2 C        | 630 mA h g <sup>-1</sup> after 500 cycles at 0.5 C     | S9               |
| VS <sub>2</sub> /rGO-S                   | 64                   | 1133, 987, 875, 616, and 401        | 0.5, 1, 2, 3, and 5 C            | 662 mA h g <sup>-1</sup> after 1200 cycles at 1 C      | S10              |
| VN/Graphene-S                            | 56                   | 1447, 1241, 1131, 953, and 710      | 0.2, 0.5, 1, 2, and 3 C          | 1128 mA h g <sup>-1</sup> after 200 cycles at 1 C      | S11              |

## References

- S1 F. Zou, Y. M. Chen, K. Liu, Z. Yu, W. Liang, S. M. Bhaway, M. Gao and Y. Zhu, *ACS Nano*, 2016, **10**, 377.
- S2 Z. M. Cui, C. X. Zu, W. D. Zhou, A. Manthiram and J. B. Goodenough, *Adv. Energy Mater.*, 2016, **28**, 6926.
- S3 Y. Lu, X. N. Li, J. W. Liang, L. Hu, Y. C. Zhu and Y. T. Qian, *Nanoscale*, 2016, **8**, 17616.
- S4 M. E. Zhong, J. D. Guan, Q. J. Feng, X. W. Wu, Z. B. Xiao, W. Zhang, S. Tong, N. Zhou and D. X. Gong, *Carbon*, 2018, **128**, 86.
- S5 D. J. Xiao, C. X. Lu, C. M. Chen and S. X. Yuan, *Energy Storage Mater.*, 2018, **10**, 216.
- S6 J. H. Song, J. M. Zheng, S. Feng, C. Z. Zhu, S. F. Fu, W. G. Zhao, D. Du and Y. H. Lin, *Carbon*, 2018, **128**, 63.
- S7 T. Chen, Z. W. Zhang, B. R. Cheng, R. P. Chen, Y. Hu, L. B. Ma, G. Y. Zhu, J. Liu and Z. Jin, *J. Am. Chem. Soc.*, 2017, **139**, 12710.
- S8 Z. Li, J. T. Zhang and X. W. Lou, *Angew. Chem. Int. Ed.*, 2015, **54**, 12886.
- S9 Z. Li, J. Zhang, B. Guan, D. Wang, L. M. Liu and X. W. Lou, *Nat. Commun.*, 2016, **7**, 13065.
- S10 Z. B. Cheng, Z. B. Xiao, H. Pan, S. Q. Wang and R. H. Wang, *Adv. Energy Mater.*, 2018, **8**, 1702337.
- S11 Z. H. Sun, J. Q. Zhang, L. C. Yin, G. J. Hu, R. P. Fang, H. M. Cheng and F. Li, *Nat. Commun.*, 2017, **8**, 14627.
